# Supplementary material
Source: PubMed Central journal article supplement (PMC3757689)
Supplement: mmc1.pdf [file mmc1.pdf]

## **Supplemental materials:**

### **Figure S1. Distribution of $\beta$ -catenin protein in O<sub>2</sub>/air recovered mouse lung.**

Representative  $\beta$ -catenin immunohistochemical staining of WT and HO-1KO lungs exposed to 3 days of hyperoxia and recovered in air for 11 days are shown at 10 x magnification. Arrows indicate clusters of cells expressing  $\beta$ -catenin in the HO-1KO lung.

### **Figure S2. Detection of protein-protein interaction of $\beta$ -catenin and HO-1.**

**A.** A representative Western blot demonstrating FLAG tagged-full length and truncated HO-1 protein in cytoplasmic and nuclear fractions. **B.** Representative Western blot after immunoprecipitation with FLAG and immunoblotting with anti- $\beta$ -catenin and HO-1 antibodies. The schematic representation of HO-1 constructs is shown in Figure 6B. V: empty vector, FL: full length HO-1, TR: truncated HO-1 lacking 53 amino acids from the c-terminus. Calnexin was used as a loading control for cytoplasm and Lamin B was used as a loading control for nucleus. Input lanes represent 10% of the cell lysates before immunoprecipitation.

### **Table. 1. Identification of potential HO-1 binding partner proteins.**

HEK293 cells stably transfected with full-length FLAG-HO-1 cDNA were exposed to hypoxia (3% O<sub>2</sub> for 24 hours) (19). Nuclear fractions were passed through a FLAG affinity column. Eluates were run on a SDS-PAGE gel and stained with colloidal blue to separate protein bands (Inset). Band numbers were referred to as orders of the appearance

on the colloidal blue stained gel (Inset). These were excised, trypsin digested and subjected to liquid chromatography/MS/MS analysis to identify potential HO-1 binding candidates. The resulting peptide masses and MS/MS spectra were searched against the nonredundant NCBI data base using the TurboSEQUENT browser. Identified proteins with top scores and amino acid sequence coverage of over 20% are listed.

**Table. 2. Lung cell cycle mRNA levels in the lungs of WT and HO-1KO neonatal mice exposed to 3 days of hyperoxia.**

Total RNA was extracted and three lung RNAs were pooled in each group before the reverse transcription.

**Table. 3. Lung cell cycle mRNA levels in the lungs of WT vs HO-1KO mice exposed to hyperoxia and recovered in air (O<sub>2</sub>) or air controls (Air).**

Total RNA was extracted and three lung RNAs were pooled in each group before the reverse transcription.

$\beta$ -catenin

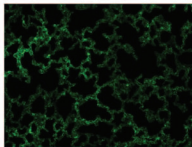

WT

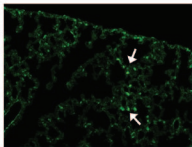

HO-1KO

Figure S1.

**A**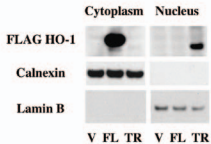**B**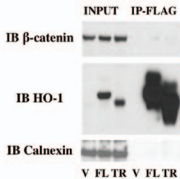**Figure S2.**

**Table 1. Proteins identified as potential nuclear HO-1 binding candidates after hypoxic stress.**

| <b>Protein Name</b>                                  | <b>Symbol</b>  | <b>Selected Functions</b>                                                                                                                                                                                            | <b>Reference</b> | <b>Band#</b> |
|------------------------------------------------------|----------------|----------------------------------------------------------------------------------------------------------------------------------------------------------------------------------------------------------------------|------------------|--------------|
| <b>Myb-binding protein 1A</b>                        | <b>MYBBP1A</b> | Activates or represses transcription via interaction with sequence specific DNA-binding proteins.                                                                                                                    | gi/71153825      | 1            |
| <b>DEAH (Asp-Glu-Ala-His) box polypeptide 9</b>      | <b>DHX9</b>    | Unwinds double-stranded DNA and RNA in a 3' to 5' direction.                                                                                                                                                         | gi/100913206     | 1            |
| <b>Poly (ADP-ribose) polymerase-1</b>                | <b>PARP1</b>   | Involved in the base excision repair pathway.                                                                                                                                                                        | gi/130781        | 2            |
| <b>Nucleolin</b>                                     | <b>NCL</b>     | Involved in the synthesis and maturation of ribosomes.                                                                                                                                                               | gi/109101818     | 3            |
| <b>14-3-3 protein major isoform</b>                  | <b>Bmh1p</b>   | Binds proteins and DNA, involved in regulation of exocytosis, vesicle transport, Ras/MAPK signaling, and rapamycin-sensitive signaling.                                                                              | gi/6321025       | 3            |
| <b>DNA topoisomerase I</b>                           | <b>TOP1</b>    | Controls and alters the topologic states of DNA during transcription.                                                                                                                                                | gi/11225260      | 3            |
| <b>SFPQ splicing factor proline/glutamine-rich</b>   | <b>SFPQ</b>    | Pre-mRNA splicing factor that also acts as a transcriptional co-repressor, and is a constituent of the PERIOD (PER) complex involved in the generation of circadian rhythms.                                         | gi/38014635      | 4            |
| <b>Heat shock 70 kDa protein-1</b>                   | <b>HSPA1A</b>  | Stabilizes existing proteins against aggregation and mediates the folding of newly translated proteins in the cytosol and in organelles.                                                                             | gi/462325        | 5            |
| <b>ATP-dependent DNA helicase II, 70 kDa subunit</b> | <b>XRCC6</b>   | Functions as a single stranded DNA-dependent ATP-dependent helicase. Involved in the repair of non-homologous DNA ends such as that required for double-strand break repair, transposition, and V(D)J recombination. | gi/4503841       | 5            |

|                                                          |               |                                                                                                                                                                                                                                                                                                                                                                                    |              |   |
|----------------------------------------------------------|---------------|------------------------------------------------------------------------------------------------------------------------------------------------------------------------------------------------------------------------------------------------------------------------------------------------------------------------------------------------------------------------------------|--------------|---|
| <b>Ribophorin II precursor</b>                           | <b>RPN2</b>   | Catalyzes the transfer of a high mannose oligosaccharide from a lipid linked oligosaccharide chain donor to an asparagine residue within an Asn-X-Ser/Thr consensus motif in nascent polypeptide chains.                                                                                                                                                                           | gi/35493916  | 6 |
| <b>Heterogeneous nuclear ribonucoprotein L</b>           | <b>hnRNPL</b> | Provides the substrate for the processing events that pre-mRNAs undergo before becoming functional, translatable mRNAs in the cytoplasm. Is associated with most nascent transcripts including those of the landmark giant loops of amphibian lampbrush chromosomes. Associates, together with APEX1, to the negative calcium responsive element (nCaRE) B2 of the APEX2 promoter. | gi/109124618 | 6 |
| <b>Non-POU domain, octamer-binding</b>                   | <b>NONO</b>   | Contains highly abundant domains of ribonucleoprotein (RNP) in eukaryotes found in proteins involved in post-transcriptional gene expression processes.                                                                                                                                                                                                                            | gi/114053303 | 7 |
| <b>Heterogeneous nuclear ribonucoprotein K</b>           | <b>hnRNPK</b> | Associates with pre-mRNAs in the nucleus and appears to influence pre-mRNA processing and other aspects of mRNA metabolism and transport. Located in the nucleoplasm and has three repeats of KH domains that binds to RNAs. Thought to have a role during cell cycle progression.                                                                                                 | gi/109111925 | 8 |
| <b>Guanine nucleotide-binding protein, beta-2-like 1</b> | <b>GNB2L1</b> | Provides a functional link between PKC signaling and ribosome activation. Is an essential component of an oxygen-independent mechanism for regulating HIF1A stability.                                                                                                                                                                                                             | gi/109080187 | 9 |

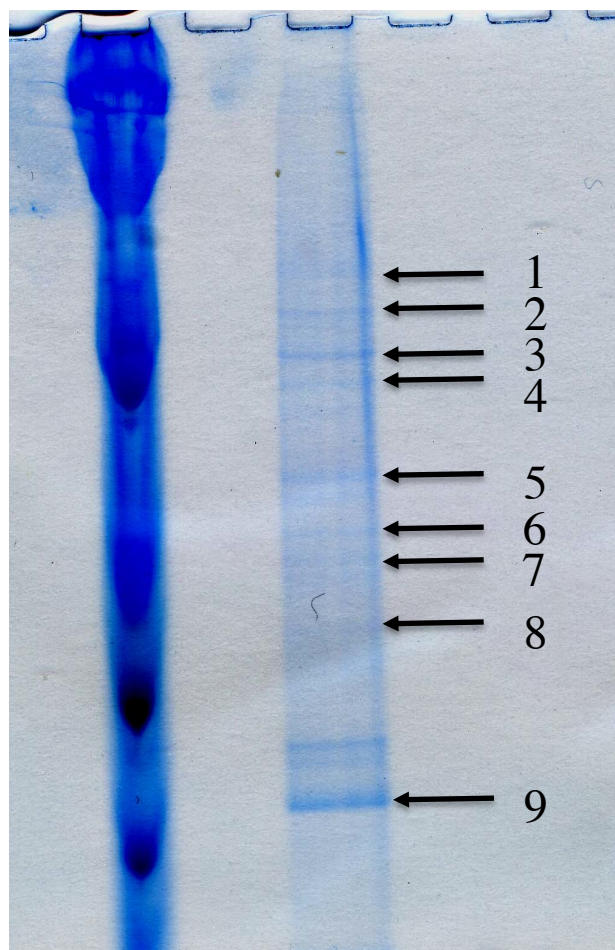

**Table 1 inset**

Table 2. Comparison of changes in cell cycle genes between hyperoxia and room air exposure in WT or HO-1KO mouse lungs.

| Symbol   | Well | O3WT vs. P3WT                                   |                   |                         |                   |                                   |                                    | O3HO-1KO vs. P3HO-1KO                           |                   |                         |                   |                                   |                                    |
|----------|------|-------------------------------------------------|-------------------|-------------------------|-------------------|-----------------------------------|------------------------------------|-------------------------------------------------|-------------------|-------------------------|-------------------|-----------------------------------|------------------------------------|
|          |      | AVG $\Delta C_t$<br>(Ct(GOI) - Ave Ct<br>(HKG)) |                   | $2^{\Delta-\Delta C_t}$ |                   | Fold<br>Difference                | Fold Up- or<br>Down-<br>Regulation | AVG $\Delta C_t$<br>(Ct(GOI) - Ave Ct<br>(HKG)) |                   | $2^{\Delta-\Delta C_t}$ |                   | Fold<br>Difference                | Fold Up- or<br>Down-<br>Regulation |
|          |      | Test<br>Sample                                  | Control<br>Sample | Test Sample             | Control<br>Sample | Test Sample<br>/Control<br>Sample | Test Sample<br>/Control<br>Sample  | Test<br>Sample                                  | Control<br>Sample | Test Sample             | Control<br>Sample | Test Sample<br>/Control<br>Sample | Test Sample<br>/Control<br>Sample  |
| Abl1     | A01  | 3.75                                            | 3.86              | 7.4E-02                 | 6.9E-02           | 1.08                              | 1.08                               | 3.00                                            | 2.45              | 1.2E-01                 | 1.8E-01           | 0.68                              | -1.46                              |
| Ak1      | A02  | 0.65                                            | 1.44              | 6.4E-01                 | 3.7E-01           | 1.72                              | 1.72                               | 0.83                                            | 1.15              | 5.6E-01                 | 4.5E-01           | 1.25                              | 1.25                               |
| Apbb1    | A03  | 2.26                                            | 3.12              | 2.1E-01                 | 1.2E-01           | 1.81                              | 1.81                               | 1.70                                            | 2.78              | 3.1E-01                 | 1.5E-01           | 2.11                              | 2.11                               |
| Atm      | A04  | 2.20                                            | 2.51              | 2.2E-01                 | 1.8E-01           | 1.23                              | 1.23                               | 1.67                                            | 1.69              | 3.1E-01                 | 3.1E-01           | 1.01                              | 1.01                               |
| Brca1    | A05  | 3.01                                            | 3.03              | 1.2E-01                 | 1.2E-01           | 1.02                              | 1.02                               | 2.31                                            | 1.79              | 2.0E-01                 | 2.9E-01           | 0.70                              | -1.43                              |
| Brca2    | A06  | 3.38                                            | 3.31              | 9.6E-02                 | 1.0E-01           | 0.95                              | -1.05                              | 2.69                                            | 2.32              | 1.6E-01                 | 2.0E-01           | 0.77                              | -1.30                              |
| Camk2a   | A07  | 3.53                                            | 4.67              | 8.6E-02                 | 3.9E-02           | 2.20                              | 2.20                               | 2.78                                            | 2.62              | 1.5E-01                 | 1.6E-01           | 0.90                              | -1.12                              |
| Camk2b   | A08  | 4.15                                            | 6.13              | 5.6E-02                 | 1.4E-02           | 3.95                              | 3.95                               | 3.48                                            | 2.79              | 9.0E-02                 | 1.4E-01           | 0.62                              | -1.61                              |
| Casp3    | A09  | 1.36                                            | 0.67              | 3.9E-01                 | 6.3E-01           | 0.62                              | -1.62                              | 0.77                                            | 0.80              | 5.9E-01                 | 5.7E-01           | 1.02                              | 1.02                               |
| Ccna1    | A10  | 4.37                                            | 4.81              | 4.8E-02                 | 3.6E-02           | 1.35                              | 1.35                               | 3.57                                            | 2.84              | 8.4E-02                 | 1.4E-01           | 0.60                              | -1.66                              |
| Ccna2    | A11  | 1.26                                            | -0.21             | 4.2E-01                 | 1.2E+00           | 0.36                              | -2.77                              | 1.29                                            | 0.14              | 4.1E-01                 | 9.1E-01           | 0.45                              | -2.22                              |
| Ccnb1    | A12  | 2.72                                            | 1.30              | 1.5E-01                 | 4.1E-01           | 0.37                              | -2.67                              | 2.38                                            | 1.32              | 1.9E-01                 | 4.0E-01           | 0.48                              | -2.07                              |
| Ccnb2    | B01  | 2.98                                            | 0.90              | 1.3E-01                 | 5.3E-01           | 0.24                              | -4.21                              | 3.14                                            | 1.88              | 1.1E-01                 | 2.7E-01           | 0.42                              | -2.39                              |
| Ccnc     | B02  | 3.60                                            | 3.18              | 8.2E-02                 | 1.1E-01           | 0.75                              | -1.34                              | 3.20                                            | 2.89              | 1.1E-01                 | 1.3E-01           | 0.80                              | -1.24                              |
| Ccnd1    | B03  | -0.29                                           | -0.15             | 1.2E+00                 | 1.1E+00           | 1.10                              | 1.10                               | -0.50                                           | 0.43              | 1.4E+00                 | 7.4E-01           | 1.91                              | 1.91                               |
| Ccne1    | B04  | 4.52                                            | 4.51              | 4.4E-02                 | 4.4E-02           | 0.99                              | -1.01                              | 3.81                                            | 3.09              | 7.1E-02                 | 1.2E-01           | 0.61                              | -1.65                              |
| Ccnf     | B05  | 4.63                                            | 5.55              | 4.0E-02                 | 2.1E-02           | 1.89                              | 1.89                               | 3.85                                            | 3.46              | 7.0E-02                 | 9.1E-02           | 0.77                              | -1.30                              |
| Cdc25a   | B06  | 2.17                                            | 2.00              | 2.2E-01                 | 2.5E-01           | 0.88                              | -1.13                              | 1.91                                            | 1.84              | 2.7E-01                 | 2.8E-01           | 0.95                              | -1.05                              |
| Cdk2     | B07  | -0.17                                           | -0.44             | 1.1E+00                 | 1.4E+00           | 0.83                              | -1.21                              | -0.27                                           | -0.10             | 1.2E+00                 | 1.1E+00           | 1.13                              | 1.13                               |
| Cdk4     | B08  | 3.75                                            | 3.53              | 7.5E-02                 | 8.7E-02           | 0.86                              | -1.16                              | 2.79                                            | 2.61              | 1.4E-01                 | 1.6E-01           | 0.88                              | -1.13                              |
| Cdk5rap1 | B09  | 2.82                                            | 3.84              | 1.4E-01                 | 7.0E-02           | 2.04                              | 2.04                               | 2.61                                            | 2.50              | 1.6E-01                 | 1.8E-01           | 0.92                              | -1.08                              |
| Cdkn1a   | B10  | -2.35                                           | 0.54              | 5.1E+00                 | 6.9E-01           | 7.40                              | 7.40                               | -2.68                                           | -0.27             | 6.4E+00                 | 1.2E+00           | 5.33                              | 5.33                               |
| Cdkn1b   | B11  | 2.95                                            | 3.05              | 1.3E-01                 | 1.2E-01           | 1.07                              | 1.07                               | 1.97                                            | 1.98              | 2.5E-01                 | 2.5E-01           | 1.01                              | 1.01                               |
| Cdkn2a   | B12  | 4.91                                            | 6.99              | 3.8E-02                 | 7.9E-03           | 4.24                              | 4.24                               | 4.62                                            | 3.89              | 4.1E-02                 | 6.8E-02           | 0.60                              | -1.66                              |
| Chek1    | C01  | 3.68                                            | 3.22              | 7.8E-02                 | 1.1E-01           | 0.73                              | -1.37                              | 2.77                                            | 2.28              | 1.5E-01                 | 2.1E-01           | 0.71                              | -1.41                              |
| Cks1b    | C02  | 0.99                                            | 0.23              | 5.0E-01                 | 8.6E-01           | 0.59                              | -1.69                              | 1.04                                            | 0.63              | 4.9E-01                 | 6.4E-01           | 0.76                              | -1.32                              |
| Ddit3    | C03  | 0.50                                            | 2.04              | 7.1E-01                 | 2.4E-01           | 2.90                              | 2.90                               | -0.13                                           | 1.49              | 1.1E+00                 | 3.6E-01           | 3.08                              | 3.08                               |
| Dnaic2   | C04  | 0.69                                            | 0.71              | 6.2E-01                 | 6.1E-01           | 1.01                              | 1.01                               | 0.43                                            | 0.68              | 7.4E-01                 | 6.2E-01           | 1.19                              | 1.19                               |
| Dst      | C05  | 0.86                                            | 0.55              | 5.5E-01                 | 6.8E-01           | 0.81                              | -1.24                              | 0.24                                            | 0.51              | 8.4E-01                 | 7.0E-01           | 1.20                              | 1.20                               |
| E2f1     | C06  | 2.96                                            | 2.48              | 1.3E-01                 | 1.8E-01           | 0.71                              | -1.40                              | 2.60                                            | 2.28              | 1.7E-01                 | 2.1E-01           | 0.80                              | -1.24                              |
| E2f2     | C07  | 4.22                                            | 6.16              | 5.4E-02                 | 1.4E-02           | 3.82                              | 3.82                               | 3.28                                            | 3.14              | 1.0E-01                 | 1.1E-01           | 0.91                              | -1.10                              |
| E2f3     | C08  | 3.16                                            | 2.71              | 1.1E-01                 | 1.5E-01           | 0.73                              | -1.36                              | 2.69                                            | 2.59              | 1.5E-01                 | 1.7E-01           | 0.93                              | -1.07                              |
| E2f4     | C09  | 0.49                                            | 0.61              | 7.1E-01                 | 6.6E-01           | 1.08                              | 1.08                               | -0.08                                           | 0.53              | 1.1E+00                 | 6.9E-01           | 1.53                              | 1.53                               |
| Gadd45a  | C10  | 0.70                                            | 1.38              | 6.2E-01                 | 3.9E-01           | 1.60                              | 1.60                               | -0.02                                           | 0.82              | 1.0E+00                 | 5.7E-01           | 1.79                              | 1.79                               |
| Gpr132   | C11  | 4.48                                            | 4.80              | 4.5E-02                 | 3.6E-02           | 1.25                              | 1.25                               | 3.30                                            | 2.63              | 1.0E-01                 | 1.6E-01           | 0.63                              | -1.60                              |
| Hus1     | C12  | 2.94                                            | 2.92              | 1.3E-01                 | 1.3E-01           | 0.99                              | -1.01                              | 4.07                                            | 2.76              | 5.9E-02                 | 1.5E-01           | 0.40                              | -2.49                              |
| Inha     | D01  | 3.35                                            | 3.82              | 9.8E-02                 | 7.1E-02           | 1.39                              | 1.39                               | 2.58                                            | 2.30              | 1.7E-01                 | 2.0E-01           | 0.83                              | -1.21                              |
| Iltg1    | D02  | -2.95                                           | -2.78             | 7.7E+00                 | 6.9E+00           | 1.12                              | 1.12                               | -3.45                                           | -2.45             | 1.1E+01                 | 5.5E+00           | 1.99                              | 1.99                               |
| Macf1    | D03  | -2.25                                           | -2.43             | 4.8E+00                 | 5.4E+00           | 0.88                              | -1.13                              | -2.90                                           | -2.29             | 7.5E+00                 | 4.9E+00           | 1.53                              | 1.53                               |
| Mad2l1   | D04  | 2.79                                            | 2.24              | 1.4E-01                 | 2.1E-01           | 0.69                              | -1.46                              | 2.12                                            | 1.67              | 2.3E-01                 | 3.1E-01           | 0.73                              | -1.36                              |
| Mcm2     | D05  | 1.12                                            | 0.36              | 4.6E-01                 | 7.8E-01           | 0.59                              | -1.70                              | 0.96                                            | 0.60              | 5.1E-01                 | 6.6E-01           | 0.78                              | -1.29                              |
| Mcm3     | D06  | 0.77                                            | -0.09             | 5.9E-01                 | 1.1E+00           | 0.55                              | -1.81                              | 0.72                                            | 0.23              | 6.1E-01                 | 8.6E-01           | 0.71                              | -1.41                              |
| Mcm4     | D07  | 0.82                                            | -0.06             | 5.6E-01                 | 1.0E+00           | 0.54                              | -1.85                              | 0.74                                            | 0.30              | 6.0E-01                 | 8.1E-01           | 0.74                              | -1.36                              |
| Mdm2     | D08  | -1.30                                           | 0.14              | 2.5E+00                 | 9.1E-01           | 2.70                              | 2.70                               | -1.37                                           | 0.14              | 2.6E+00                 | 9.1E-01           | 2.85                              | 2.85                               |
| Mki67    | D09  | 0.37                                            | -1.16             | 7.7E-01                 | 2.2E+00           | 0.35                              | -2.89                              | 0.44                                            | -0.75             | 7.4E-01                 | 1.7E+00           | 0.44                              | -2.28                              |
| Mre11a   | D10  | 3.13                                            | 3.48              | 1.1E-01                 | 8.9E-02           | 1.28                              | 1.28                               | 2.37                                            | 2.14              | 1.9E-01                 | 2.3E-01           | 0.86                              | -1.17                              |
| Msh2     | D11  | 1.55                                            | 1.22              | 3.4E-01                 | 4.3E-01           | 0.79                              | -1.26                              | 1.46                                            | 1.61              | 3.6E-01                 | 3.3E-01           | 1.11                              | 1.11                               |
| Mtbp     | D12  | 2.75                                            | 2.88              | 1.5E-01                 | 1.4E-01           | 1.10                              | 1.10                               | 2.12                                            | 1.87              | 2.3E-01                 | 2.7E-01           | 0.84                              | -1.19                              |
| Myb      | E01  | 3.13                                            | 3.29              | 1.1E-01                 | 1.0E-01           | 1.12                              | 1.12                               | 2.55                                            | 2.60              | 1.7E-01                 | 1.6E-01           | 1.04                              | 1.04                               |
| Nek2     | E02  | 5.19                                            | 4.00              | 2.7E-02                 | 6.3E-02           | 0.44                              | -2.28                              | 4.54                                            | 3.57              | 4.3E-02                 | 8.4E-02           | 0.51                              | -1.96                              |
| Nfatc1   | E03  | 1.64                                            | 1.55              | 3.2E-01                 | 3.4E-01           | 0.94                              | -1.06                              | 1.01                                            | 1.13              | 5.0E-01                 | 4.6E-01           | 1.08                              | 1.08                               |
| Notch2   | E04  | 2.17                                            | 2.39              | 2.2E-01                 | 1.9E-01           | 1.17                              | 1.17                               | 1.21                                            | 1.55              | 4.3E-01                 | 3.4E-01           | 1.27                              | 1.27                               |
| Npm2     | E05  | 4.58                                            | 6.27              | 4.2E-02                 | 1.3E-02           | 3.24                              | 3.24                               | 3.54                                            | 3.18              | 8.6E-02                 | 1.1E-01           | 0.78                              | -1.28                              |
| Pcna     | E06  | -1.01                                           | -1.58             | 2.0E+00                 | 3.0E+00           | 0.68                              | -1.48                              | -1.07                                           | -1.13             | 2.1E+00                 | 2.2E+00           | 0.96                              | -1.05                              |
| Pes1     | E07  | 0.00                                            | 0.34              | 1.0E+00                 | 7.9E-01           | 1.26                              | 1.26                               | -0.32                                           | 0.26              | 1.2E+00                 | 8.3E-01           | 1.49                              | 1.49                               |
| Pkd1     | E08  | 0.41                                            | 0.40              | 7.5E-01                 | 7.6E-01           | 0.99                              | -1.01                              | -0.35                                           | 0.42              | 1.3E+00                 | 7.4E-01           | 1.72                              | 1.72                               |
| Pmp22    | E09  | -2.65                                           | -2.72             | 6.3E+00                 | 6.6E+00           | 0.95                              | -1.05                              | -2.67                                           | -2.22             | 6.4E+00                 | 4.6E+00           | 1.37                              | 1.37                               |
| Ppm1d    | E10  | 1.46                                            | 1.47              | 3.6E-01                 | 3.6E-01           | 1.00                              | 1.00                               | 1.00                                            | 1.24              | 5.0E-01                 | 4.2E-01           | 1.17                              | 1.17                               |
| Ppp2r3a  | E11  | 3.99                                            | 3.99              | 6.3E-02                 | 6.3E-02           | 1.00                              | -1.00                              | 3.46                                            | 3.56              | 9.1E-02                 | 8.5E-02           | 1.07                              | 1.07                               |
| Ppp3ca   | E12  | -1.28                                           | -0.71             | 2.4E+00                 | 1.6E+00           | 1.49                              | 1.49                               | -1.49                                           | -0.44             | 2.8E+00                 | 1.4E+00           | 2.07                              | 2.07                               |
| Prrm1    | F01  | 4.65                                            | 6.61              | 4.0E-02                 | 1.0E-02           | 3.90                              | 3.90                               | 3.67                                            | 3.29              | 7.9E-02                 | 1.0E-01           | 0.77                              | -1.30                              |
| Rad17    | F02  | 1.79                                            | 1.69              | 2.9E-01                 | 3.1E-01           | 0.93                              | -1.07                              | 1.56                                            | 2.10              | 3.4E-01                 | 2.3E-01           | 1.45                              | 1.45                               |
| Rad21    | F03  | -0.44                                           | -1.22             | 1.4E+00                 | 2.3E+00           | 0.58                              | -1.72                              | -0.75                                           | -0.63             | 1.7E+00                 | 1.5E+00           | 1.09                              | 1.09                               |
| Rad51    | F04  | 4.77                                            | 4.06              | 3.7E-02                 | 6.0E-02           | 0.61                              | -1.63                              | 4.57                                            | 4.45              | 4.2E-02                 | 4.6E-02           | 0.92                              | -1.09                              |
| Rad9     | F05  | 2.71                                            | 3.00              | 1.5E-01                 | 1.2E-01           | 1.23                              | 1.23                               | 2.41                                            | 2.55              | 1.9E-01                 | 1.7E-01           | 1.10                              | 1.10                               |
| Ran      | F06  | -3.63                                           | -3.60             | 1.2E+01                 | 1.2E+01           | 1.02                              | 1.02                               | -3.49                                           | -3.16             | 1.1E+01                 | 8.9E+00           | 1.26                              | 1.26                               |
| Rbl1     | F07  | 2.53                                            | 2.35              | 1.7E-01                 | 2.0E-01           | 0.88                              | -1.14                              | 1.86                                            | 1.65              | 2.8E-01                 | 3.2E-01           | 0.87                              | -1.16                              |
| Rbl2     | F08  | 1.70                                            | 1.24              | 3.1E-01                 | 4.2E-01           | 0.73                              | -1.38                              | 1.01                                            | 1.45              | 5.0E-01                 | 3.7E-01           | 1.35                              | 1.35                               |
| Sesn2    | F09  | 3.09                                            | 4.37              | 1.2E-01                 | 4.8E-02           | 2.43                              | 2.43                               | 2.53                                            | 3.28              | 1.7E-01                 | 1.0E-01           | 1.69                              | 1.69                               |
| Sfn      | F10  | 1.11                                            | 3.36              | 4.6E-01                 | 9.8E-02           | 4.75                              | 4.75                               | 0.09                                            | 1.60              | 9.4E-01                 | 3.3E-01           | 2.83                              | 2.83                               |
| Shc1     | F11  | 0.05                                            | 0.28              | 9.7E-01                 | 8.3E-01           | 1.17                              | 1.17                               | -0.48                                           | 0.03              | 1.4E+00                 | 9.8E-01           | 1.43                              | 1.43                               |
| Skp2     | F12  | 4.44                                            | 4.07              | 4.6E-02                 | 6.0E-02           | 0.77                              | -1.30                              | 4.06                                            | 3.63              | 6.0E-02                 | 8.1E-02           | 0.74                              | -1.35                              |
| Slnf1    | G01  | 3.68                                            | 4.59              | 7.8E-02                 | 4.1E-02           | 1.88                              | 1.88                               | 2.28                                            | 2.25              | 2.1E-01                 | 2.1E-01           | 0.98                              | -1.02                              |
| Smc1a    | G02  | 1.15                                            | 0.69              | 4.5E-01                 | 6.2E-01           | 0.73                              | -1.37                              | 0.77                                            | 0.86              | 5.9E-01                 | 5.5E-01           | 1.07                              | 1.07                               |
| Stag1    | G03  | 0.90                                            | 0.87              | 5.4E-01                 | 5.5E-01           | 0.98                              | -1.02                              | 0.47                                            | 0.97              | 7.2E-01                 | 5.1E-01           | 1.42                              | 1.42                               |
| Sumo1    | G04  | -0.96                                           | -0.83             | 1.9E+00                 | 1.8E+00           | 1.09                              | 1.09                               | -1.07                                           | -0.68             | 2.1E+00                 | 1.6E+00           | 1.31                              | 1.31                               |
| Taf10    | G05  | -0.67                                           | -0.39             | 1.6E+00                 | 1.3E+00           | 1.22                              | 1.22                               | -0.86                                           | -0.23             | 1.8E+00                 | 1.2E+00           | 1.55                              | 1.55                               |
| Terf1    | G06  | 3.06                                            | 2.86              | 1.2E-01                 | 1.4E-01           | 0.87                              | -1.15                              | 2.34                                            | 2.42              | 2.0E-01                 | 1.9E-01           | 1.06                              | 1.06                               |
| Tfdp1    | G07  | -0.21                                           | -0.25             | 1.2E+00                 | 1.2E+00           | 0.98                              | -1.03                              | -0.36                                           | -0.05             | 1.3E+00                 | 1.0E+00           | 1.24                              | 1.24                               |
| Psmg2    | G08  | 0.92                                            | 1.18              | 5.3E-01                 | 4.4E-01           | 1.20                              | 1.20                               | 0.87                                            | 1.34              | 5.5E-01                 | 4.0E-01           | 1.38                              | 1.38                               |
| Trp53    | G09  | 1.37                                            | 0.10              | 3.9E-01                 | 9.3E-01           | 0.41                              | -2.41                              | -0.18                                           | 0.25              | 1.1E+00                 | 8.4E-01           | 1.35                              | 1.35                               |
| Trp63    | G10  | 4.90                                            | 8.34              | 3.4E-02                 | 3.1E-03           | 10.85                             | 10.85                              | 4.03                                            | 3.45              | 6.1E-02                 | 9.1E-02           | 0.67                              | -1.49                              |
| Tsg101   | G11  | -0.80                                           | -0.61             | 1.7E+00                 | 1.5E+00           | 1.14                              | 1.14                               | -1.02                                           | -0.43             | 2.0E+00                 | 1.3E+00           | 1.50                              | 1.50                               |
| Wee1     | G12  | 3.80                                            | 3.89              | 7.2E-02                 | 6.8E-02           | 1.06                              | 1.06                               | 3.05                                            | 3.40              | 1.2E-01                 | 9.5E-02           | 1.27                              | 1.                                 |

Table 3. Lung cell cycle mRNA levels in the lungs of WT and HO-1KO mice exposed to hyperoxia and recovered in air (O2) vs air controls (Air).

|          |      | O2 WT vs. Air WT                                |                |                                |                |                             |                             | O2 HO-1KO vs. Air HO-1KO                        |                |                                |                |                             |                             |
|----------|------|-------------------------------------------------|----------------|--------------------------------|----------------|-----------------------------|-----------------------------|-------------------------------------------------|----------------|--------------------------------|----------------|-----------------------------|-----------------------------|
| Symbol   | Well | AVG ΔC <sub>t</sub><br>(Ct(GOI) - Ave Ct (HKG)) |                | 2 <sup>Δ</sup> ΔC <sub>t</sub> |                | Fold Difference             | Fold Up- or Down-Regulation | AVG ΔC <sub>t</sub><br>(Ct(GOI) - Ave Ct (HKG)) |                | 2 <sup>Δ</sup> ΔC <sub>t</sub> |                | Fold Difference             | Fold Up- or Down-Regulation |
|          |      | Test Sample                                     | Control Sample | Test Sample                    | Control Sample | Test Sample /Control Sample | Test Sample /Control Sample | Test Sample                                     | Control Sample | Test Sample                    | Control Sample | Test Sample /Control Sample | Test Sample /Control Sample |
| Abi1     | A01  | 3.13                                            | 0.87           | 1.1E-01                        | 5.5E-01        | 0.21                        | -4.79                       | -5.56                                           | 2.10           | 4.7E+01                        | 2.3E-01        | 201.69                      | 201.69                      |
| Ak1      | A02  | 1.68                                            | 0.55           | 3.1E-01                        | 6.8E-01        | 0.46                        | -2.19                       | -6.26                                           | 1.07           | 7.6E+01                        | 4.8E-01        | 160.01                      | 160.01                      |
| Apbb1    | A03  | 2.61                                            | 1.35           | 1.6E-01                        | 3.9E-01        | 0.42                        | -2.40                       | -5.42                                           | 2.00           | 4.3E+01                        | 2.5E-01        | 170.54                      | 170.54                      |
| Atm      | A04  | 2.29                                            | 1.06           | 2.1E-01                        | 4.8E-01        | 0.43                        | -2.33                       | -3.11                                           | 1.91           | 8.7E+00                        | 2.7E-01        | 32.54                       | 32.54                       |
| Brca1    | A05  | 3.09                                            | 1.30           | 1.2E-01                        | 4.1E-01        | 0.29                        | -3.45                       | -3.26                                           | 1.96           | 9.5E+00                        | 2.6E-01        | 37.17                       | 37.17                       |
| Brca2    | A06  | 3.50                                            | 1.90           | 8.9E-02                        | 2.7E-01        | 0.33                        | -3.02                       | -3.26                                           | 2.35           | 9.6E+00                        | 2.0E-01        | 49.04                       | 49.04                       |
| Camk2a   | A07  | 3.62                                            | 1.71           | 8.1E-02                        | 3.1E-01        | 0.27                        | -3.76                       | 2.97                                            | 1.98           | 1.3E-01                        | 2.5E-01        | 0.50                        | -1.98                       |
| Camk2b   | A08  | 3.68                                            | 1.47           | 7.8E-02                        | 3.6E-01        | 0.22                        | -4.65                       | -5.56                                           | 2.02           | 4.7E+01                        | 2.5E-01        | 191.08                      | 191.08                      |
| Casp3    | A09  | 0.95                                            | 1.06           | 5.2E-01                        | 4.8E-01        | 1.08                        | 1.08                        | -3.64                                           | 1.09           | 1.3E+01                        | 4.7E-01        | 26.54                       | 26.54                       |
| Ccna1    | A10  | 3.51                                            | 1.33           | 8.8E-02                        | 4.0E-01        | 0.22                        | -4.53                       | -5.44                                           | 1.61           | 4.4E+01                        | 3.3E-01        | 132.79                      | 132.79                      |
| Ccna2    | A11  | 1.32                                            | 0.92           | 4.0E-01                        | 5.3E-01        | 0.76                        | -1.31                       | -2.75                                           | 0.80           | 6.7E+00                        | 5.8E-01        | 11.66                       | 11.66                       |
| Ccnb1    | A12  | 2.65                                            | 0.96           | 1.6E-01                        | 5.1E-01        | 0.31                        | -3.23                       | -1.33                                           | 1.54           | 2.5E+00                        | 3.4E-01        | 7.35                        | 7.35                        |
| Ccnb2    | B01  | 3.31                                            | 2.17           | 1.0E-01                        | 2.2E-01        | 0.46                        | -2.20                       | 1.13                                            | 3.34           | 4.6E-01                        | 9.9E-02        | 4.64                        | 4.64                        |
| Ccnc     | B02  | 3.39                                            | 1.82           | 9.5E-02                        | 2.8E-01        | 0.34                        | -2.98                       | -1.99                                           | 2.71           | 4.0E+00                        | 1.5E-01        | 26.01                       | 26.01                       |
| Ccnd1    | B03  | 1.13                                            | 0.91           | 4.6E-01                        | 5.3E-01        | 0.86                        | -1.16                       | 3.90                                            | 1.36           | 6.7E-02                        | 3.9E-01        | 0.17                        | -5.82                       |
| Ccne1    | B04  | 4.60                                            | 2.13           | 4.1E-02                        | 2.3E-01        | 0.18                        | -5.55                       | -0.36                                           | 2.76           | 1.3E+00                        | 1.5E-01        | 8.70                        | 8.70                        |
| Ccnf     | B05  | 4.29                                            | 2.09           | 5.1E-02                        | 2.3E-01        | 0.22                        | -4.59                       | 0.77                                            | 2.71           | 5.9E-01                        | 1.5E-01        | 3.82                        | 3.82                        |
| Cdc25a   | B06  | 1.95                                            | 1.62           | 2.6E-01                        | 3.3E-01        | 0.79                        | -1.26                       | -1.22                                           | 1.71           | 2.3E+00                        | 3.1E-01        | 7.62                        | 7.62                        |
| Cdk2     | B07  | 0.93                                            | 0.82           | 5.2E-01                        | 5.7E-01        | 0.93                        | -1.08                       | 2.17                                            | 0.65           | 2.2E-01                        | 6.4E-01        | 0.35                        | -2.87                       |
| Cdk4     | B08  | 3.41                                            | 1.24           | 9.4E-02                        | 4.2E-01        | 0.22                        | -4.51                       | -2.14                                           | 1.84           | 4.4E+00                        | 2.8E-01        | 15.71                       | 15.71                       |
| Cdk5rap1 | B09  | 3.71                                            | 1.82           | 7.6E-02                        | 2.8E-01        | 0.27                        | -3.70                       | -2.75                                           | 2.01           | 6.7E+00                        | 2.5E-01        | 27.17                       | 27.17                       |
| Cdkn1a   | B10  | 0.49                                            | 0.38           | 7.1E-01                        | 7.7E-01        | 0.93                        | -1.08                       | -1.19                                           | 0.47           | 2.3E+00                        | 7.2E-01        | 3.17                        | 3.17                        |
| Cdkn1b   | B11  | 3.63                                            | 1.43           | 8.1E-02                        | 3.7E-01        | 0.22                        | -4.58                       | 0.53                                            | 2.08           | 6.9E-01                        | 2.4E-01        | 2.93                        | 2.93                        |
| Cdkn2a   | B12  | 3.98                                            | 1.78           | 6.3E-02                        | 2.9E-01        | 0.22                        | -4.59                       | 1.83                                            | 2.44           | 2.8E-01                        | 1.8E-01        | 1.53                        | 1.53                        |
| Chek1    | C01  | 3.64                                            | 1.33           | 8.0E-02                        | 4.0E-01        | 0.20                        | -4.95                       | 3.35                                            | 2.35           | 9.8E-02                        | 2.0E-01        | 0.50                        | -1.99                       |
| Cks1b    | C02  | 2.66                                            | 1.22           | 1.6E-01                        | 4.3E-01        | 0.37                        | -2.72                       | -0.22                                           | 1.93           | 1.2E+00                        | 2.6E-01        | 4.44                        | 4.44                        |
| Cdkt3    | C03  | 2.39                                            | 0.84           | 1.9E-01                        | 5.6E-01        | 0.34                        | -2.93                       | 1.96                                            | 1.56           | 2.6E-01                        | 3.4E-01        | 0.76                        | -1.31                       |
| Dnajc2   | C04  | 0.32                                            | 0.00           | 8.0E-01                        | 1.0E+00        | 0.80                        | -1.24                       | 2.79                                            | 0.31           | 1.4E-01                        | 8.1E-01        | 0.18                        | -5.59                       |
| Dst      | C05  | 1.55                                            | 0.82           | 3.4E-01                        | 5.7E-01        | 0.60                        | -1.66                       | -0.22                                           | 1.09           | 1.2E+00                        | 4.7E-01        | 2.47                        | 2.47                        |
| E2f1     | C06  | 3.25                                            | 2.20           | 1.0E-01                        | 2.2E-01        | 0.48                        | -2.07                       | 1.22                                            | 2.39           | 4.3E-01                        | 1.9E-01        | 2.25                        | 2.25                        |
| E2f2     | C07  | 4.73                                            | 3.22           | 3.8E-02                        | 1.1E-01        | 0.35                        | -2.85                       | -4.75                                           | 3.58           | 2.7E+01                        | 8.4E-02        | 320.02                      | 320.02                      |
| E2f3     | C08  | 3.85                                            | 2.30           | 6.9E-02                        | 2.0E-01        | 0.34                        | -2.92                       | 1.59                                            | 2.84           | 3.3E-01                        | 1.4E-01        | 2.38                        | 2.38                        |
| E2f4     | C09  | 1.78                                            | 1.06           | 2.9E-01                        | 4.8E-01        | 0.61                        | -1.65                       | 2.87                                            | 1.08           | 1.4E-01                        | 4.7E-01        | 0.29                        | -3.46                       |
| Gadd45a  | C10  | 0.75                                            | 0.46           | 6.0E-01                        | 7.3E-01        | 0.82                        | -1.22                       | -3.26                                           | 0.27           | 9.6E+00                        | 8.3E-01        | 11.54                       | 11.54                       |
| Gpr132   | C11  | 3.40                                            | 1.97           | 9.5E-02                        | 2.6E-01        | 0.37                        | -2.70                       | -0.12                                           | 2.13           | 1.1E+00                        | 2.3E-01        | 4.76                        | 4.76                        |
| Hus1     | C12  | 1.90                                            | 1.08           | 2.7E-01                        | 4.7E-01        | 0.57                        | -1.76                       | 3.89                                            | 1.33           | 6.7E-02                        | 4.0E-01        | 0.17                        | -5.92                       |
| Inha     | D01  | 3.51                                            | 1.33           | 8.8E-02                        | 4.0E-01        | 0.22                        | -4.55                       | -2.05                                           | 2.00           | 4.1E+00                        | 2.5E-01        | 16.54                       | 16.54                       |
| Itqb1    | D02  | -1.97                                           | -1.61          | 3.9E+00                        | 3.0E+00        | 1.29                        | 1.29                        | 3.21                                            | -1.70          | 1.1E-01                        | 3.2E+00        | 0.03                        | -30.00                      |
| Macf1    | D03  | -1.21                                           | -0.55          | 2.3E+00                        | 1.5E+00        | 1.58                        | 1.58                        | -0.05                                           | -0.58          | 1.0E+00                        | 1.5E+00        | 0.69                        | -1.44                       |
| Mad2l1   | D04  | 2.26                                            | 0.76           | 2.1E-01                        | 5.9E-01        | 0.35                        | -2.82                       | -4.90                                           | 1.29           | 3.0E+01                        | 4.1E-01        | 73.06                       | 73.06                       |
| Mcm2     | D05  | 2.00                                            | 1.29           | 2.5E-01                        | 4.1E-01        | 0.61                        | -1.63                       | -0.31                                           | 1.42           | 1.2E+00                        | 3.7E-01        | 3.31                        | 3.31                        |
| Mcm3     | D06  | 1.03                                            | 1.14           | 4.9E-01                        | 4.6E-01        | 1.08                        | 1.08                        | -1.46                                           | 1.03           | 2.8E+00                        | 4.9E-01        | 5.64                        | 5.64                        |
| Mcm4     | D07  | 0.59                                            | 0.89           | 6.6E-01                        | 5.4E-01        | 1.23                        | 1.23                        | -1.66                                           | 0.68           | 3.2E+00                        | 6.2E-01        | 5.07                        | 5.07                        |
| Mdm2     | D08  | 1.06                                            | 0.85           | 4.8E-01                        | 5.5E-01        | 0.87                        | -1.15                       | 3.68                                            | 1.01           | 7.8E-02                        | 5.0E-01        | 0.16                        | -6.36                       |
| Mki67    | D09  | 0.04                                            | -0.30          | 9.7E-01                        | 1.2E+00        | 0.79                        | -1.26                       | 1.73                                            | -0.45          | 3.0E-01                        | 1.4E+00        | 0.22                        | -4.55                       |
| Mre11a   | D10  | 3.61                                            | 1.58           | 8.2E-02                        | 3.4E-01        | 0.24                        | -4.10                       | 0.41                                            | 1.93           | 7.5E-01                        | 2.6E-01        | 2.85                        | 2.85                        |
| Msh2     | D11  | 0.64                                            | 0.56           | 6.4E-01                        | 6.8E-01        | 0.95                        | -1.05                       | 2.78                                            | 0.61           | 1.5E-01                        | 6.5E-01        | 0.22                        | -4.48                       |
| Mtbp     | D12  | 2.97                                            | 1.03           | 1.3E-01                        | 4.9E-01        | 0.26                        | -3.84                       | 1.65                                            | 1.61           | 3.2E-01                        | 3.3E-01        | 0.97                        | -1.03                       |
| Myb      | E01  | 3.36                                            | 1.36           | 9.8E-02                        | 3.9E-01        | 0.25                        | -4.00                       | 1.91                                            | 2.10           | 2.7E-01                        | 2.3E-01        | 1.14                        | 1.14                        |
| Nek2     | E02  | 4.66                                            | 2.63           | 4.0E-02                        | 1.6E-01        | 0.25                        | -4.07                       | -0.51                                           | 3.50           | 1.4E+00                        | 8.8E-02        | 16.20                       | 16.20                       |
| Nfatc1   | E03  | 1.82                                            | 0.86           | 2.8E-01                        | 5.5E-01        | 0.51                        | -1.94                       | 2.10                                            | 1.15           | 2.3E-01                        | 4.5E-01        | 0.52                        | -1.93                       |
| Notch2   | E04  | 3.46                                            | 1.78           | 9.1E-02                        | 2.9E-01        | 0.31                        | -3.20                       | -2.67                                           | 2.16           | 6.3E+00                        | 2.2E-01        | 28.38                       | 28.38                       |
| Npm2     | E05  | 3.88                                            | 2.21           | 6.8E-02                        | 2.2E-01        | 0.31                        | -3.18                       | -0.91                                           | 2.46           | 1.9E+00                        | 1.8E-01        | 10.35                       | 10.35                       |
| Pcna     | E06  | 0.65                                            | 0.71           | 6.4E-01                        | 6.1E-01        | 1.05                        | 1.05                        | -1.23                                           | 0.39           | 2.3E+00                        | 7.7E-01        | 3.07                        | 3.07                        |
| Pes1     | E07  | 0.25                                            | -0.32          | 8.4E-01                        | 1.2E+00        | 0.67                        | -1.49                       | -0.59                                           | -0.23          | 1.5E+00                        | 1.2E+00        | 1.28                        | 1.28                        |
| Pkd1     | E08  | 0.93                                            | 1.04           | 5.3E-01                        | 4.9E-01        | 1.08                        | 1.08                        | -0.14                                           | 0.84           | 1.1E+00                        | 5.6E-01        | 1.96                        | 1.96                        |
| Pmp22    | E09  | -3.40                                           | -3.09          | 1.1E+01                        | 8.5E+00        | 1.23                        | 1.23                        | 0.61                                            | -3.16          | 6.6E-01                        | 8.9E+00        | 0.07                        | -13.62                      |
| Ppm1d    | E10  | 1.72                                            | 1.23           | 3.0E-01                        | 4.3E-01        | 0.71                        | -1.40                       | -2.82                                           | 1.37           | 7.1E+00                        | 3.9E-01        | 18.30                       | 18.30                       |
| Ppp2r3a  | E11  | 4.63                                            | 2.82           | 4.0E-02                        | 1.4E-01        | 0.28                        | -3.51                       | -4.05                                           | 3.08           | 1.7E+01                        | 1.2E-01        | 140.36                      | 140.36                      |
| Ppp3ca   | E12  | -0.43                                           | -0.52          | 1.4E+00                        | 1.4E+00        | 0.94                        | -1.06                       | 2.66                                            | -0.50          | 1.6E-01                        | 1.4E+00        | 0.11                        | -8.95                       |
| Prm1     | F01  | 3.99                                            | 1.53           | 6.3E-02                        | 3.5E-01        | 0.18                        | -5.50                       | 0.97                                            | 2.22           | 5.1E-01                        | 2.2E-01        | 2.37                        | 2.37                        |
| Rad17    | F02  | 1.31                                            | 0.74           | 4.0E-01                        | 6.0E-01        | 0.67                        | -1.48                       | 1.86                                            | 1.28           | 2.8E-01                        | 4.1E-01        | 0.67                        | -1.49                       |
| Rad21    | F03  | -0.93                                           | -0.38          | 1.9E+00                        | 1.3E+00        | 1.46                        | 1.46                        | -0.82                                           | -0.57          | 1.8E+00                        | 1.5E+00        | 1.18                        | 1.18                        |
| Rad51    | F04  | 6.06                                            | 4.37           | 1.5E-02                        | 4.8E-02        | 0.31                        | -3.22                       | 0.11                                            | 4.85           | 9.2E-01                        | 3.5E-02        | 26.69                       | 26.69                       |
| Rad9     | F05  | 3.05                                            | 2.14           | 1.2E-01                        | 2.3E-01        | 0.53                        | -1.89                       | 2.12                                            | 2.30           | 2.3E-01                        | 2.0E-01        | 1.13                        | 1.13                        |
| Ran      | F06  | -2.53                                           | -2.28          | 5.8E+00                        | 4.9E+00        | 1.18                        | 1.18                        | 3.84                                            | -2.79          | 7.0E-02                        | 6.9E+00        | 0.01                        | -99.18                      |
| Rbl1     | F07  | 2.90                                            | 1.47           | 1.3E-01                        | 3.6E-01        | 0.37                        | -2.70                       | 1.67                                            | 1.72           | 3.1E-01                        | 3.0E-01        | 1.04                        | 1.04                        |
| Rbl2     | F08  | 1.67                                            | 1.62           | 3.1E-01                        | 3.3E-01        | 0.96                        | -1.04                       | 0.31                                            | 1.52           | 8.1E-01                        | 3.5E-01        | 2.33                        | 2.33                        |
| Sesn2    | F09  | 4.47                                            | 2.91           | 4.5E-02                        | 1.3E-01        | 0.34                        | -2.95                       | -1.24                                           | 2.89           | 2.4E+00                        | 1.3E-01        | 17.48                       | 17.48                       |
| Sfn      | F10  | 2.78                                            | 0.98           | 1.5E-01                        | 5.1E-01        | 0.29                        | -3.48                       | 1.31                                            | 1.15           | 4.0E-01                        | 4.5E-01        | 0.89                        | -1.12                       |
| Shc1     | F11  | 1.37                                            | 0.43           | 3.9E-01                        | 7.4E-01        | 0.52                        | -1.91                       | 0.88                                            | 0.80           | 5.4E-01                        | 5.7E-01        | 0.95                        | -1.05                       |
| Skp2     | F12  | 4.48                                            | 2.79           | 4.5E-02                        | 1.4E-01        | 0.31                        | -3.22                       | 2.33                                            | -12.41         | 2.0E-01                        | 5.5E+03        | 0.00                        | -27345.20                   |
| Slnf1    | G01  | 3.58                                            | 1.27</         |                                |                |                             |                             |                                                 |                |                                |                |                             |                             |
